# Supplementary material for: Technical note: a new analytical protocol for apatite (U-Th)/He and trace element analysis (incorporating a continuous ramped heating measurement system for the He)
Source: Copernicus journal article supplement (doi:10.5194/gchron-2024-6), 2024-02-14
Supplement: Supplementary file [file gchron-2024-6-RC1-supplement.pdf]

This manuscript is a technical paper describing the effort and the development of a (U-Th)/He facility at the University of Rennes (GeOHeLiS laboratory) between 2021 and 2023. This new facility is developing a methodology for Helium (He) released from apatite by continuous ramped heating and a trace element analysis without any spiked solution (i.e. isotopic dilution method), and referred to as the “concentration range approach”. Although the ramped heating methodology for He has been previously described and documented, the authors are attempting to use the mass spectrometer sensitivity to determine their  $^4\text{He}$  concentrations based on Durango shards as standards. Overall, I found the manuscript poorly written and organized. The paper has some inconsistencies and a lack of information regarding the trace element analysis as well as the continuous ramped heating protocol. The results and the discussion are overlapping making the paper difficult to follow. Moreover, the authors do not explain the discrepancies between the database and the figures. The new “concentration range approach” methodology is not explained leading to some open questions regarding their protocol. Considering that the “concentration range approach” is presented as a new methodology, I would have appreciated a thoroughly explanation of the authors’ work, which is not the case. In addition, the authors’ attempt to use the sensitivity parameter from the magnetic sector mass spectrometry to a quadrupole mass spectrometer is not convincing due to a lack of explanation.

The figures are also not quite on the level of publication quality, and the experimental approach and results are not well enough documented. Below I have listed my comments, primarily focusing on the major issues. The formatting aspects and my detailed comments are, at this stage, secondary but need attention. Nevertheless, I appreciate the effort of the authors to try new analytical solutions for noble gas spectrometry and trace element analysis. However, this manuscript is not sufficient to support the authors’ methodologies and concepts. Therefore, I do not recommend this manuscript for publication and recommend the authors a major re-work and attention to their manuscript before considering it for publication.

#### Major comments:

**The structure of the paper** is confusing. There is no clear section presenting the methods, the results, or the discussions. As an example, the authors are mixing the description of the noble gas line (section 2 with subsection 2.1) with the  $^4\text{He}$  quantification method (subsection 2.3) and the quadrupole sensitivity determination (subsection 2.4) in a section that should be focused only on the description of their analytical system (section 2). Moreover, the quadrupole sensitivity is further explained in section 4.2 (quadrupole calibration and standard age) and the  $^4\text{He}$  quantification is extended in section 3.2 (U-Th/He protocol) and section 4.3.3 (Gas consumption correction and  $^4\text{He}$  quantification). This structural issue can be applied all along the paper. Consequently, the text is difficult to follow and it is tedious to understand the authors’ work. This points toward a lack of attention to the quality of the manuscript. I would recommend the authors re-work their sections and have dedicated sections for their methods and dedicated sections for their results and discussion.

**Use of the Sensitivity for quadrupole  $^4\text{He}$  measurement.** One of the major steps in this paper is the use of sensitivity (S) to determine  $^4\text{He}$  concentration in a quadrupole mass spectrometer. The authors are using the definition of sensitivity, expressed in concentration/signal (mol/amp). The paper is based on the work of Gautheron et al. 2021 where the sensitivity of their VG5400 is determined using such definition of the sensitivity (i.e. in mol/amp). However, the equation provided by the authors differs from the one in Gautheron et al., 2021 as they replaced the Drift (D) parameter with a combination of an ionization efficiency ( $I_e$ ) and a sensitivity term. From my understanding of the Gautheron et al., 2021 paper, the authors used a sensitivity term that differs from the classic sensitivity definition, which corresponds to the capacity of the detector to measure a signal in function of the partial pressure of the gas and is expressed in signal/pressure (usually in amp/torr). Consequently, the sensitivity expressed in the paper (i.e. mol/amp) is not only expressing the mass spectrometer sensitivity (in amp/torr) but also specific parameters to the analytical system (such as the dilution coefficient and the initial extraction volume). Therefore, sensitivity in this paper expresses an extended sensitivity, that is not solely dependent on the mass spectrometer itself, but also on the purification line design. The description given by the authors is, however, resumed at line **97**: “we built on the Gautheron et al. (2021) method, simplifying it a little and modifying it” but do not provide sufficient detailed information of how they modify it (see detailed comments below for line **97**), simplify it (I guess by adding two parameters ( $I_e$  and S) instead of D), or give detailed information of the concept used. First, I would rather keep the sensitivity as solely a mass spectrometer parameter and not include other specific parameters from the analytical system (the same can apply to the Gautheron et al. 2021 paper). This can be misleading as this formulation of the sensitivity is more complex and more difficult to use for inter-lab comparison and calibration. Secondly, I do not understand why the sensitivity is required here. The  $^3\text{He}$  content from the well-known  $^3\text{He}$  reservoir should be sufficient to calculate the  $^4\text{He}$  content based on the  $^4\text{He}/^3\text{He}$  ratio measured in the sample (and blank corrected). The authors could cross-calibrate the  $^3\text{He}$  content in the tank using standard Durango shards (similarly to Gautheron et al., 2021) to better account for the non-linearity of the quadrupole signal. Also, their sensitivity measurement remains a bit unclear, as to calculate S the authors simply remove it from equation 2 and consider an ideal behavior of the mass spectrometer (i.e.  $I_e = 1$ , implying a constant sensitivity of

the quadrupole over the temperature, the filament voltage, etc....). If so, equation 2 is then the same as equation 1 given by Gautheron et al., 2021, but without the  $^3\text{He}$  tank calibrated with the Durango shards and the D parameter accounting for the drift. This could lead, to my opinion, to a less precise and less well-calibrated system. This is supported by the range of the Durango He-age determined by the authors (from 23.3 to 38.1 Ma) compared to the ages given by Gautheron et al., 2021 (27 to 34.9 Ma) (see Fig. 8). In addition, the dimension of the equation 2 is quite confusing. If I am correct, the authors are determining the  $^4\text{He}$  content in the sample (mol) by multiplying their sensitivity parameter (mol/amp) to the  $^3\text{He}$  content predicted in the pipette (mol) from their equation 1, and the ratio of the  $^4\text{He}/^3\text{He}$  measured and blank corrected in the sample. Consequently, the dimension of equation 2 for  $^4\text{He}$  concentration is not in mol, but in  $\text{mol}^2/\text{Amp}$  (considering that  $I_e$  is dimensionless). At least this is what it is expressed by using the equation 1 and 2 in the paper. What I am supposing, however, is that the authors are using the  $^3\text{He}$  predicted signal (amp) from the pipette solely to derivate the  $^4\text{He}$  signal (amp) from their measured  $^4\text{He}/^3\text{He}$  ratio. Therefore, knowing precisely the  $^3\text{He}$  content in the pipette seems to not be required (but only the relative decrease over time) as they are using S to calculate their  $^4\text{He}$  content (instead of the  $^3\text{He}$  pipette). I, therefore, do not understand the choice of the authors to not use their well-calibrated  $^3\text{He}$  tank but only rely on Durango shards. In Gautheron et al., 2021, the authors did a cross-calibration of the  $^3\text{He}$  tank content with the deviation of the Durango ages which allows a better constraint on the quadrupole signal variability. That, according to me, would give a much better calibrated system than a calibration solely based on the Durango. In addition, the  $I_e$  parameter is calculated (see line 107) by comparing the  $^3\text{He}$  predicted signal in the pipette (mol) to the associated peak height (amp) but according to me, this should be used to convert the signal to concentration and not to determine their drift factor. Moreover, the  $I_e$  definition given in the paper seems very close to the D parameter defined in Gautheron et al., 2021, and I do not fully understand the fundamental difference between  $I_e$  and D, and how this methodology is simpler or easier to set up, while ensuring similar data quality than in Gautheron et al., 2021. Finally, this section is, for me, not convincing. The authors' explanations are not satisfactory and lack of information. Equation 2 seems wrong in terms of dimension (or incorrectly described) and I am a bit concerned by the data quality that the system can produce due to the uncertainties of the calibration. I am genuinely wondering why the authors are not simply using the protocol from Gautheron et al. 2021 which has a more robust calibration method adapted to the quadrupole line, especially knowing that Cecile Gautheron seems to have helped the authors to set up their system (see the acknowledgment section). If there is a reason behind this strategy is it neither clear nor convincing to me. I would therefore recommend the authors to re-work this section and ensure that all their parameters and concepts are properly explained and tested.

**Calculated age MK1 and Durango.** The validation of the methodology is based on the fact that Durango and MK1 are used as reference standards to check the calibration. As the system is calibrated over a range of 20 (or 36? See detailed comment below for line 122) Durango shards, it is, indeed, reassuring that the Durango run as unknowns yields to an age in agreement with the calibration using the same Durango age. However, I could argue that this cannot rule out some systematic analytical bias as you are comparing Durango with a calibration based on these very same Durango. On the other hand, the authors provide a dataset on MK1 apatite with a reference weighted mean age given by Wu et al., 2021 Chem. Geo. at 17.99 +/- 0.02Ma (from 191 Apatite fragments and 6 different laboratories). The authors provide a good agreement between this value and their data, with a measured age at 17.7Ma +/- 0.6Ma (over 10 MK1 samples). However, I have few concerns regarding the dataset provided and used in the paper. In the supplementary material (Sup. Mat. 2 – standard ages and ThU, SmTh ratio and Sup. Mat. 3 – standards age calculation) the authors reference 10 MK1 samples providing their age, Th/U and Sm/Th as well as their  $^4\text{He}$  concentration in ccSTP. First, I would like to mention that I would overall recommend avoiding ccSTP as a unit for the concentration. Please use the unit of moles or atoms as it gives a more precise and direct indication of your real concentrations. The ccSTP implies that you normalize the pressure and the temperature of your standard to the normal condition (1 atm and 0°C) but usually, the temperature and pressure of the standard are rarely given. Therefore, it is a good habit to express the concentration in moles or atoms to be independent of the lab condition and provide to the reader a precise estimation of your measurements. Secondly, the Sup. Mat. 1 – standard concentration, provide 15 MK1 trace element analyses instead of 10 given in the other table and the text. There is no age associated with the extra 5 MK1 samples (which represent 1/3 of the dataset for MK1). I am not sure why those 5 additional MK1 data are disregarded from the dataset. The names of the additional MK1 also overlap with samples already given (there are 2 samples MK1B or MK1C for example) but they display different U, Th, and Sm concentrations, and likely He-age, although no  $^4\text{He}$  concentration or age are provided for these additional MK1 apatite. In addition, the authors specify later that only 4 MK1 were used due to blank limitation (see line 406) but still plotted 10 MK1 ages in Fig. 10. Consequently, the MK1 dataset seems to have some discrepancies that the authors need to clear out, and explain before to use MK1 samples for validation of the methodology. In addition, the errors on the mass, U, Th, and Sm are all constant (for example 2.03% for Ca mass for MK1 and Durango) and I am not understanding why considering the range of content measured in the samples and the fact that the authors are not using any spike (see **Error bar propagation** section below).

**Concentration range approach.** The “concentration range approach” is referred in the text as a well-known method. However, the authors provide no references for the method, only specifying in lines 243-245 “standard concentration ranges to quantify the amount of element in a solution is a classic and well-documented approach in geochemistry”. From my experience, I don't know what the term concentration range approach implies. I can only suspect that the authors actually refer to the standard addition method (see *Burns and Walker 2019, Origins of the method of standard additions and of the use of an internal standard in quantitative instrumental chemical analyses.*

*Analytical and Bioanalytical Chemistry* and reference within). If I am correct, I would recommend the authors to be careful with the terminology used, specifically if the authors do not bother to provide references for the methodology. In any case, I would have expected at least a short description of the method used here as it is referred as a new approach to determining trace elements (line 17). I am, therefore, not sure if the authors are referring to the method of standard addition or something else. I would bet, however, that the authors might use the single-point standard addition methods. Consequently, from my understanding, the sample needs to be separated in two, one part analyzed under normal conditions for QQQ-ICP-MS analysis and one part mixed with a known amount of standard (using the dilution factor) and also analyzed with QQQ-ICP-MS. Therefore, if I am correct, how the apatite crystal is prepared/separated for the analysis, what is the spike/solution used in the standard addition method and what is the amount of sample compared to the spiked solution (to avoid matrix effect on the standard's matrix)? It is unfortunate that the authors do not provide much information. The only insights regarding the methodology used by the authors are located in the discussion section and are the minimum concentration required for analysis, and the evaluation of the dilution factor. At this stage, I really would have preferred reviewing what the author did rather than to guess. Despite some apparent encouraging results in Figure 7, there are lots of open questions and uncertainties in this protocol that are concerning. The lack of available data from the authors is also not helpful. For example, figure 7 displays an apparent good fit between the QQQ-ICP-MS analysis and two external measurements (one with LA-ICP-MS and one at the SARM in Nancy) of Durango samples. The authors used this plot as the argument that their "concentration range approach" is valid. Considering the importance of Figure 7, I do not think that the use of a log scale plot is a good visual estimation of how reproducible the method is compared to the other reference techniques. I would therefore question the relevance of CI chondrite for normalization and I would rather suggest a comparison between the three methods, based on the residual spectrum between the external measurement (LA-ICP-MS and SARM) and the new methodology (QQQ-ICP-MS). Such a plot would prove more useful to validate the methods and track down any potential analytical bias or discrepancy. In addition, the authors do not provide the LA-ICP-MS and the SARM data in their dataset or details of the analytical procedure used at the SARM or for the LA-ICP-MS analysis. Finally, a new protocol, even using a well-known methodology requires careful consideration and could justify its own scientific communication. This is, unfortunately, far from what the paper provides. Consequently, the new methodology used by the authors remains unclear. This is very unfortunate as this is critical for understanding how the author determined their U-Th-Sm concentration as well as other trace elements.

**Th/U vs. Sm/Th relationship.** One of the authors' findings in this paper is the linear behaviors of the Th/U vs. Sm/Th in Figure 8. The author suggested that their measured U-Th-Sm ratios are plotted on a negative linear correlation (Fig.8). This negative linear relationship is interpreted by the authors as a product of crystal heterogeneity and they excluded any possible chemical bias on the Th measurement. The authors also report in Figure 8 the age of each Durango shard and show that best age estimations are reached for Apatite crystal lying on the regression line. There is a discrepancy, however, between the available dataset provided by the author (Sup. Mat.1 – standard concentration) and the data represented in Figure 8. To represent that discrepancy, I have quickly plotted (see below) a similar figure to Figure 8 in the paper (i.e. Th/U vs. Sm/Th) but with all the available datasets given in the supplementary material (Figure A) and with highlights on the data only shown in the paper (small red full circles, Figure B).

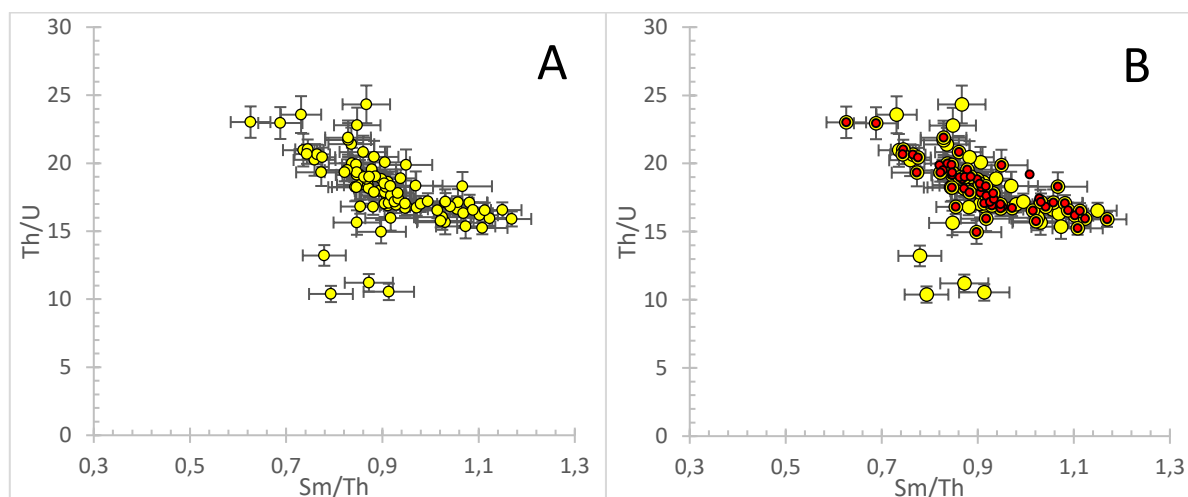

This discrepancy is not explained in the main text and no reason is given for why not all the provided data is used to interpret the U-Th-Sm dataset. More importantly, the selected data shown in Fig.8 suggest that a clear negative relationship between the Th/U and the Sm/Th ratio exists while considering the whole dataset, this evidence is questionable, especially with the error bars (Figure A). The authors also argue that the (U/Th)-He ages of the Apatite are best when lying on the regression line, however, the apatite ages are not provided for the whole dataset but only for the selected apatite grain (small red full circles, figure B). This led to serious concern regarding the

authors' interpretation of their data. I would suggest using all your available He ages, Th/U, and Sm/Th ratios in one clear figure and verifying if your assumption for a negative linear relationship remains true and if the best ages estimate for the Durango apatite crystals are still located on a specific trend. In addition, I noticed that the range of the Durango apatite ages is quite large, ranging between 23.3 and 38.1 Ma (from Fig.8) while data from Gautheron et al., 2021 are ranging between 27 and 34.9 Ma. This is a significantly larger range, meaning that the quality of the data is also questionable compared to the methods used by Gautheron et al., 2021. This should be mentioned and discussed by the authors. Additionally, the authors ruled out any chemical bias on the Th measurement as the data should then not define a linear regression but a systematic ratio shift. I could argue that a systematic ratio shift from an initial linear trend could still be a linear trend but shifted from its original position. To my opinion, this is not sufficient to rule out any chemical bias on the Th. Moreover, the majority of the U/Th ratios observed from the Durango in Gautheron et al., 2021 display values ranging between 18 and 25, and Sm/Th values ranging between ~0.4 and 0.8 while those analyzed in this paper range between 14 and 20 (U/Th) and ~0.9 and 1.1 (Sm/Th). The significant shift toward higher Sm/Th and toward lower U/Th values is not discussed in the paper but could be the result of a systematic bias on the Th. Systematic bias on Th would induce higher values on the X axis (Sm/Th) and lower values on the Y axis (Th/U) if Th is lost and/or underestimated during analysis. This could explain the shift of the dataset between this paper and Gautheron et al., 2021. Finally, the authors expressed that they already observed such a negative linear trend on volcanic Apatite crystal but failed to provide any references at line 308. I want to point out that "from an internal lab experience" cannot be used as a decent scientific reference.

**Ramped step heating experiment.** The authors claimed that they can derive the diffusion behavior and kinetics information of the samples from their ramped heating experiments (see lines 16, 40, 366, and 444), but this is supported by none of the data provided. The authors did not provide any kinetics information either in the main text or in the figures. I would have expected some  $^4\text{He}$  release spectra in function of the temperature as well as some  $^4\text{He}$  Arrhenius plot of the Durango apatite to investigate if their protocol is reliable (see Idleman et al., 2018). It seems that the authors are relying solely on the comparison between the pyrometer and the thermocouple measurements. However, the methodology used by the authors to mount their capsules with the thermocouple is not properly described (i.e. line 368: "capsule set on a thermocouple"). How the capsule is attached to the thermocouple? do you follow the same protocol given by Idleman et al. 2018? Knowing the critical importance of a well-calibrated temperature system for kinetics studies, it is important to explicitly provide here all the details of the method (see Idleman et al. 2018). Moreover, thermocouples can easily have a bias if not placed properly near the samples (see also Idleman et al. 2018 for detailed discussion). In addition, the pyrometer calibration methodology is not provided by the author (did you calibrate independently the pyrometer against a black body or some reference material?). A better approach, according to me, would have been to compare the kinetics data on their Durango with the literature. The authors, however, only provide a partially calculated diffusion coefficient ( $D_0/a^2$ ) in Sup. Mat. 4, but neither the activation energy ( $E_a$ ) nor the diffusive behavior of the samples (i.e. plot with  $\log(D/a^2)$  vs.  $1/T$ ). The  $D_0$  coefficient only represents the 'infinite' temperature diffusion and defines the intersection of the  $\log(D/a^2)$  axis in an Arrhenius plot. This does not give sufficient insight into the diffusive behavior of  $^4\text{He}$  in their Durango apatite from their ramped step heating experiments. Moreover, the authors provide neither the  $^4\text{He}$  content, the  $^4\text{He}$  signal nor the  $^4\text{He}$  release fraction as raw data in the ramping heating table and therefore make it impossible to investigate any kinetics on their Durango. In addition, the large ramped step heating dataset provided (see Sup. Mat. 4 – ramped heating) is giving zero useful information for the paper despite a large amount of data (see my detailed comments below on Sup. Mat. 4 for more details).

**Error bar propagation.** I noticed that the error bars on the Th/U and Sm/Th are likely underestimated. For example, the authors calculate the error on their Th/U ratio at 4.1% for sample D22P3G while the corresponding error on the U and Th are also given at 4.1% for both U and Th. The authors didn't propagate the error from the Th and the U on the ratio. Usually, an error propagation should lead to an error closer to 5.7% with an error of 4.1% on both the U and the Th. In addition, I would like to know how the errors are calculated for the other trace elements as the errors in the dataset are almost all fixed at a unique value of ~4% for every trace element analysis. I do not understand how you can get a unique and fixed error for all the trace elements analyzed over a wide range of Durango crystals. Please provide more details on your error determination. Similarly, the sample mass (based on the Ca content) also displays a uniform error value (at 2.03% for MK1 apatite as an example), regardless of the amount of Ca measured in the samples. I would have expected some variability at least due to the variation of the Ca mass in each sample and the fact that no spiked solution is used to determine their concentration. I also would like to point out that the authors specified that they analyzed 10 MK1 samples, with a measured age at 17.7Ma +/- 0.6Ma (line 357) but later they mention that only 4 MK1 were successfully analyzed due to blank limitation (line 406) and give an age at 17.6Ma +/- 2.6Ma, which is a much larger error on the analyzed standards. Why there are two different statements on MK1 samples, and which are the MK1 samples that have been rejected over the 10 samples? (or 15 if we refer to the dataset provided in Sup. Mat. 1 – standard concentration, see my comment on the calculated age MK1 and Durango above). This is a bit confusing regarding the importance of the MK1 samples in the validation of the methods.

**Error on the blanks.** In Fig. 4, the authors are extrapolating the cold blank when the system is static, to higher temperature based on the signal drift prior to the experiment. In addition, they also use blank capsules run as samples with the ramped heating protocol (line 395). First how long do you measure the blank evolution prior to starting the laser? And secondly, why do you use a cold blank extrapolation? I would expect that blank capsules

analyzed as samples with the ramped step heating protocol should provide the closest blank values compared to a sample and therefore should be used instead of an extrapolation from the cold static line. Therefore, how do you correct the blank at the end? Are you applying a systematic blank from the extrapolation, or the blank capsules, it is dependent on the sample, or a mix? This remains unclear in the text and the dataset. Please provide more info and a detailed example of how you are treating the blanks. The authors also mentioned the fact that 70% of the samples analyzed on their system (including natural samples, pipettes, and standards) get enough signal to overcome the blank background and “60% of blanks” (line 398). The authors' formulation is unclear. What do 60% of blanks mean here? Is that the sample signal is higher than a blank by 60%? Also, what is the success rate if only natural samples are selected (i.e. excluding your pipettes and standards)? In addition, the authors mentioned some abnormal blank behavior associated with their low  $^4\text{He}$  samples. However, I am not sure why the behavior is qualified as abnormal simply because it is not linear. As this non-linear behavior seems to affect systematically the low  $^4\text{He}$  samples, therefore it should be considered as a normal characteristic of those samples and treated as such. Moreover, it is expected to have a different behavior between low and high  $^4\text{He}$  concentration (or partial pressure of He) in the ionization chamber. Indeed, for low He content, there is a strong memory effect that can contribute significantly to the  $^4\text{He}$  signal, while for high content, this effect is negligible, and mostly gas consumption by the filament affects the He signal. Nevertheless, blank correction should therefore include a systematic non-linear behavior for samples with low  $^4\text{He}$ . In addition, you are smoothing the signal in Fig.4B, which might refer to the filtering process (see also my detailed comment below on Lines 213-214). How that is affecting the initial small  $^4\text{He}$  signal?

#### Detailed comments:

The article uses a mix of French and English words in figures (see Fig.1 with *ionique* vs *ionic*) and tables (see Sup. Mat 3 with “*Ech*” vs. Sample and “*masse*” vs. mass). This points toward a not thoroughly reviewed manuscript prior to submission by the authors. I recommend the authors again be sure of the quality of the paper prior to submission.

**Sup. Mat. 3** – Standards ages calculation. This supplementary table provides important data from their analyzed Durando and MK1 standards (i.e.  $^4\text{He}$  content (ccSTP), sample mass,  $^4\text{He}/^3\text{He}$  ratio, pipette number, etc....). The provided data allow the calculation of the  $^3\text{He}$  predicted from each pipette using equation 1 in the paper. By doing such, and considering a  $V_{\text{pip}}$  of 5.8cc, a  $V_{\text{tank}}$  of 5741cc, an initial  $^3\text{He}$  of  $5 \times 10^{-11}$  mol (given by the author for a cylinder pressure of  $1 \times 10^{-6}$  mbar, at line 103), and the pipette number in the table, we can calculate the  $^3\text{He}$  content predicted for each sample. Alternatively, the  $^3\text{He}$  content for each sample can be determined by comparing the measured  $^4\text{He}/^3\text{He}$  ratio and the measured  $^4\text{He}$  concentration. However, when I compare the two values, I observe significant discrepancies between the  $^3\text{He}$  predicted by the pipette number and the  $^3\text{He}$  given by the measured  $^4\text{He}/^3\text{He}$  ratio for the same pipette number. As an example, for the pipette number 180 (sample D22P3G) the  $^3\text{He}$  predicted (equation 1) is calculated at  $4.2 \times 10^{-11}$  mol while the  $^3\text{He}$  estimated from the  $^4\text{He}/^3\text{He}$  ratio is at  $5.4 \times 10^{-10}$  mol (with a  $^4\text{He}/^3\text{He}$  ratio at  $1.44 \times 10^{-4}$  and a  $^4\text{He}$  at  $7.8 \times 10^{-14}$  mol). From my understanding, those values should be similar as the  $^3\text{He}$  predicted by equation 1 should be the quantity injected alongside the sample for  $^4\text{He}$  determination. In addition, I observed that the ratio between  $^3\text{He}$  predicted and  $^3\text{He}$  measured is nearly constant over all the standards (i.e. MK1 and Durango), implying that this is likely due to some constant parameter inducing a factor  $\sim 13$  between the two concentrations. Such discrepancy and homogeneity in that ratio ( $\sim 13$ ) could reveal an issue with the analytical protocol and/or a miscalibration of the system that requires some investigation.

**Sup. Mat. 4** – ramped step heating data is providing zero useful information. Some of the data name suffixes (i.e. blc, Sci, CO1, or 19#15) are not explained and I do not know what those data represent. Moreover, the sample series D22P2 (from A to T) and D22P3 (from A to F) are not shown in the text or the result or even mentioned or discussed by the authors. The sample series mentioned in the paper (Fig. 10 and Sup. Mat. 3 tables) starts only from D22P3-G (which is exactly when the ramped step heating dataset stops, i.e. D22P3-F). In addition, the raw data only include the  $^4\text{He}/^3\text{He}$  ratio while it is essential to get the  $^4\text{He}$  signal in function of the temperature (or even the fraction of released He). This is needed if we want to ensure that the ramped step heating protocol produces a normal degassing pattern for diffusion experiments (see my comment above on the ramped step heating experiment). Consequently, I am not sure why the authors provided so much data (up to 27824 lines on the Excel sheet) with zero use for the paper and zero information regarding the samples used in the study.

**Fig. 1.** Please check for the French language occurrence and correct it. What are the blue and red dots on the top view of the sample holder?

**Fig. 9.** How the error bars on the  $^4\text{He}$  calculated content vs. signal are calculated? I suspect it is a plotting effect, but the small  $^4\text{He}$  signals seem to yield to very small error bars (which seems unlikely). I would recommend giving the data in a table in the main text for the reader to understand better the dataset. Also, those data are not provided in the supplementary materials given by the authors. In addition, please explain the label in Figure 9B (what C.H or R.H means?)

**Fig. 10:** The early Durango shards (prior to pipette ~300) are showing much higher heterogeneity in their He-age compared to the one analyzed after pipette number ~300. The author only specifies that this is due to some “Q-He line change” (i.e. analytical system modification). I would like a more detailed explanation of what changed before and after pipette number 300, and how this had such an impact on the dataset. So far this has not been explained.

**Fig 12.** The figure is a bit confusing. Are you using the blank on the empty capsules to correct your signal in all your data or the extrapolation from the static blank evolution? (see my comments above on the error in the blanks). Also, some ramping step heating experiments seem quite erratic with strong variation in the ramping slope. Is that an intentional experiment with extreme change in the ramping or it is reflecting some anomalies during the ramping for some samples? Such anomalies need to be stated and discussed by the author if they are observed.

**Title:** Using parenthesis to refer to the ramped heating measurement is clumsy to my opinion. Everything in a title should be important and concise. Using parenthesis implies secondary information and thus shouldn't be in the title.

**Line 15:** The authors are giving an estimation of their error at “~3.9% in the  $^4\text{He}$  content determination”. How this is calculated? The only other occurrence found in the paper mentioning this error is on the Durango ages dispersion over 45 Durango shards (lines 350-351). Regarding the Durango age uncertainties, how do you calculate them as well? From my calculation, the standard deviation calculated from supplementary material (Sup. Mat. 2 – Durango age ThU-SmTh ratio), over the available Durango He-age is  $31.1 \pm 8.7\%$ . Moreover, this error does not propagate the individual errors from each Durango age which can range from 2.2% (D23P6D) to 16.3% (DG6C). The paper specifies that the Durango age yields to a central age of  $31.11 \pm 0.7\%$  (or 0.23Ma) which is much less than the standard deviation over the Durango shards analyzed and the minimum error measured on the Durango shard D23P6D. How it is possible? Moreover, as mentioned before, the range of (U/Th)-He age on the Durango Apatite is much greater in this paper than the range observed in the Gautheron et al., 2021 paper. This points toward some analytical issues and the quality of the data is overestimated by the authors.

**Line 66:** Do you refer to a two-color pyrometer or a dual-wavelength pyrometer? Please specify in any case as two wavelengths is confusing with modern pyrometers terminology. Also, how did you calibrate the pyrometer? For dual-wavelengths and/or two-color pyrometers, the emissivity is not required but the slope is an important parameter to calibrate for accurate temperature. Did you use the thermocouple installed on the system and calibrate the pyrometer against it, or did you use a separate system (black body or reference material)?

**Line 88-89:** Not relevant details.

**Line 97:** “modifying a little bit” is neither precise nor adequate to describe what is modified from Gautheron et al., 2021 method for  $^4\text{He}$  determination. I would avoid using such vague descriptions in your scientific papers and rather explain precisely and in detail what you have modified. For the sake of clarity, I recommend that important details should be provided immediately, or within the current section where it is mentioned.

**Line 99:** How do you determine the volume and their associated errors?

**Line 100-101:** replace (re)filled by only filled. Remove the parenthesis statement. This is not relevant as the volume of the pipette is given and it is fixed at ~5.8cc.

**Line 102:** How the internal pressure of the cylinder is adjusted? Does the system have some ballast to modify the internal volume or do the authors purge and fill the  $^3\text{He}$  tank with a more or less diluted standard?

**Line 105:** Equation 1 gives the predicted decrease of the  $^3\text{He}$  content (in mol) in the pipette as a function of the depletion of the reservoir (given by the number of pipettes taken). This equation is correct if the pipette volume is purged every time (i.e.  $V_{\text{pip}}$  is pumped out of the left-over gas from the cylinder). Did the authors clean the pipette volume prior to a new inlet? If not, the author needs to consider the left-over gas inside the pipette as it can induce a deviation with time from equation 3 if not accounted for. This effect is important if the pipette volume is large, which seems the case here with a pipette volume of ~5.8cc (vs. ~0.5cc for Gautheron et al., 2021).

**Line 122:** The authors mention ~20 Durango fragments used to set up the calibration, but later in the text they refer to 34 Durango fragments (**line 320**). Which number is the correct one?

**Line 124-126:** The authors specify that they have plotted  $^4\text{He}$  content vs.  $^4\text{He}$  signal for sensitivity determination but no figure is mentioned. I guess the author refers to Figure 9. Please always refer to the figure when you mention it in the text.

**Line 140:** "in-house LabVIEW software that includes automatic grain detection and size measurement" How this is performed automatically with LabVIEW? Does it pick automatically the grain, and record the length, height, and width as well as the termination geometry of the crystal? More details here would be beneficial. I suspect that if using ToupView software, the measurements are done manually. Did you perform a comparison between an automatic measurement with LabVIEW and a user manual measurement?

**Line 170:** You specify that the Q-He line is pumped out for 2 min between samples but at line 198, you mention 10 min. Which protocol is correct?

**Line 210:** Where is the plot for the cumulative helium loss vs. temperature from your data? This should be provided here.

**Line 212:** You mention a very fast transfer time (<1s) between your laser extraction cell and the mass spectrometer. First, the reference provided (McDannell et al., 2018) does not mention or give any indication of the typical conductance time for the <sup>4</sup>He transfer from the extraction cell to the analyzer. Secondly, the paper from Idleman et al., (2018) does provide some indication and gives a specific time of 2s. They mention: "*In our He extraction line, the time constant for pressure equilibration after the addition of small He aliquots to the extraction line is < 2 s over the range of He pressures typically encountered during CRH experiments. This short delay corresponds to an effective mismatch between the recorded sample temperature and He measurement of 1 °C or less at typical heating rates, and is small enough to be ignored in most situations.*" To my opinion, this needs to be carefully addressed and calculated from your own line. You cannot refer to someone else transfer time (or only compare the range) as this is specifically controlled by the very own (and unique) design of your prep line. Consequently, the time can be a few seconds to tens of seconds and needs to be determined properly. Moreover, you specify at line 415 that your purification line has a "large volume" (although no volume is provided) and therefore this could further increase the transfer time of He due to greater line volume to equilibrate. In any case, less than a second seems an unreasonable short time and I would recommend estimating that time properly and the effect on your He measurement.

**Line 213-214:** How the filter is applied? You mention that <sup>4</sup>He/<sup>3</sup>He is the raw ratio, which implies that it is not blank-corrected. Is the filtering made before or after blank correction? This could impact the initial low signal as filtering a dataset implies removing some signal, which can be critical on the first step when the signal is often very close to the noise level. I would recommend preferably to have a measurement of the baseline integrated for each analysis and to subtract the measured noise before any filtering of the data.

**Line 237, 272, 288, 456, and Figure 6:** Careful with using weight and mass. I am guessing that you refer to the mass (in g or μg) and not the weight of your sample. Those are two different measures and have scientifically different meanings. Please check your table as well.

**Fig. 7:** Barra et al., 2012 is not listed in the reference. The caption mentions that Durango Apatite "seems to be internally homogeneous". Is that an observation from the figure or an assumption from the authors? Please be more specific and give a value to assert either the assumption or the interpretation.

**Line 237.** The reference for the equation referring to the Gautheron et al., 2021 paper is incorrect. Equation 3 in Gautheron et al., 2021 expresses the <sup>4</sup>He calculation with their VG5400 magnetic sector field. The correct equation that the authors might refer to is given in Appendix B of the Gautheron et al., 2021 paper (Eq. B5). Gautheron et al., 2021 are using the following equation based on the work of Guenther et al., (2016):

$$Apatite (\mu g) = \frac{{}^{43}Ca \times 10^{-9}}{0.135/100} \times \frac{1}{0.4 \times 10^{-6}}$$

On the other hand, the authors provide the following more general equation:

$$Apatite_{weight} = \frac{Ca_{weight}}{0.3974}$$

As mentioned before, the authors are likely referring to the mass and not the weight and therefore expressing the mass of Ca and the Apatite in g or μg. Also, the equation does not match the one the article is referring to. Gautheron et al., 2021 are using the <sup>43</sup>Ca isotope to determine the mass, while the authors are using the total Ca content. Could you please provide the correct references, and detail why you are using total Ca and not the isotope <sup>43</sup>Ca to determine the Apatite mass? How does this impact your mass determination and the effect on the U-Th-Sm?

**Line 350:** you provide an average value of 31.1Ma with an error of 0.23Ma based on the 45 Durango fragments analyzed. In the supplementary material (Sup. Mat. 2 – Durango age) you provide 60 Durango samples but you do not specify which ones are selected for the average age. Nevertheless, I am guessing that you removed the Durango shards analyzed prior to pipette #319 as before that, the Q-line seems to have analytical issues (those issues are, however, not described or specified in the text). Therefore, taking the data of Durango shards from pipette #335 to #874 led to an average age of 31Ma +/- 1.6Ma (or 5.2%) for the standard variation. How do you calculate your age with an error of 0.23Ma (or 0.7%)?

**Line 351:** What means 3.9+/-1.3% (is 3.9Ma +/-1.3%)?

**Section 4.3.** The title of the section is confusing (what is feedback on a ramped heating development?). Therefore, the subsections are lacking of homogeneity (see my comment on the structure of the paper above).

**Line 386:** “Sample holder cooking”? Do you mean baking?

**Line 402:** How the first stage of the laser run (zone 1) is inducing abnormal gas consumption? He signals from Fig. 3 seem to not be affected by the burst of gas observed in the first stage. Also, the timing of the gas burst in zone 1 in Fig. 3 seems to be on the order of ~1 min while non-linear behavior for He in Fig. 12 seems to last up to ~10min (the time on the X axis in Fig. 3 and 12 are hard to read however). Consequently, that assumption from the authors seems unlikely.

This detailed list is not exhaustive and can include more comments. However, I think the authors get some ideas of the work required for the paper. I am, therefore, stopping here the detailed comments but strongly advise the authors to thoroughly check and ensure a sufficient quality of every section and data presented in the paper before publication.
